# Supplementary material for: Expression of IL-23 in gilt endometrium and oviduct after insemination with seminal plasma, spermatozoa or semen extender
Source: Research Square preprint supplement (doi:10.21203/rs.3.rs-41381/v3), 2021-04-06
Supplement: Supplementary file 1 [file 9a0e20050163563a9e6bfb0f.docx]

**ARRIVE checklist**

1. Study design – The study design is described under “Methods” paragraph 1 “Experimental design” on page 10-11.

2. Sample size – The sample size is reported under “Methods” paragraph 1 “Experimental design” on page 10-11.

3. Inclusion and exclusion criteria – The experimental groups/units are described in detail under “Methods” paragraph 1 “Experimental design” on page 10-11. No exclusions were made during the experiments or analyses.

4. Randomisation – N/A

5. Blinding – Some results were analysed blinded which is described in each section. The quantification of endometrial PMNs is described under “Methods” paragraph 3 “Quantification of endometrial PMNs” on page 11.

The intensity of the IL-23 immunolabelling of endometrium and endosalpinx was estimated according to a scoring system. This assessment was blinded by coding the pictures before the estimation of intensity. This is described under “Methods” paragraph 6 “Immunohistochemistry” on page 14-15.

6. Outcome measures – N/A

7. Statistical methods – All statistical methods used is reported under “Methods” paragraph 7 “Statistical analyses” on page 15.

8. Experimental animals – Details are described under “Methods” paragraph 1 “Experimental design” on page 10.

9. Experimental procedures – The procedures concerning the animals are described under “Methods” paragraph 1 “Experimental design” and paragraph 2 “Semen preparation and insemination” on page 10-11.

10. Results – All results are reported under “Results” on page 4-7.
